# Supplementary material for: Systematic Identification, Evolution and Expression Analysis of the Zea mays PHT1 Gene Family Reveals Several New Members Involved in Root Colonization by Arbuscular Mycorrhizal Fungi
Source: PubMed Central journal article supplement (PMC4926463; doi:10.3390/ijms17060930), 2016-06-13
Supplement: ijms-17-00930-s001.pdf [file ijms-17-00930-s001.pdf]

# Supplementary Materials: Systematic Identification, Evolution and Expression Analysis of the *Zea mays* PHT1 Gene Family Reveals Several New Members Involved in Root Colonization by Arbuscular Mycorrhizal Fungi

Fang Liu, Yunjian Xu, Huanhuan Jiang, Chaosheng Jiang, Yibin Du, Cheng Gong, Wei Wang, Suwen Zhu, Guomin Han and Beijiu Cheng

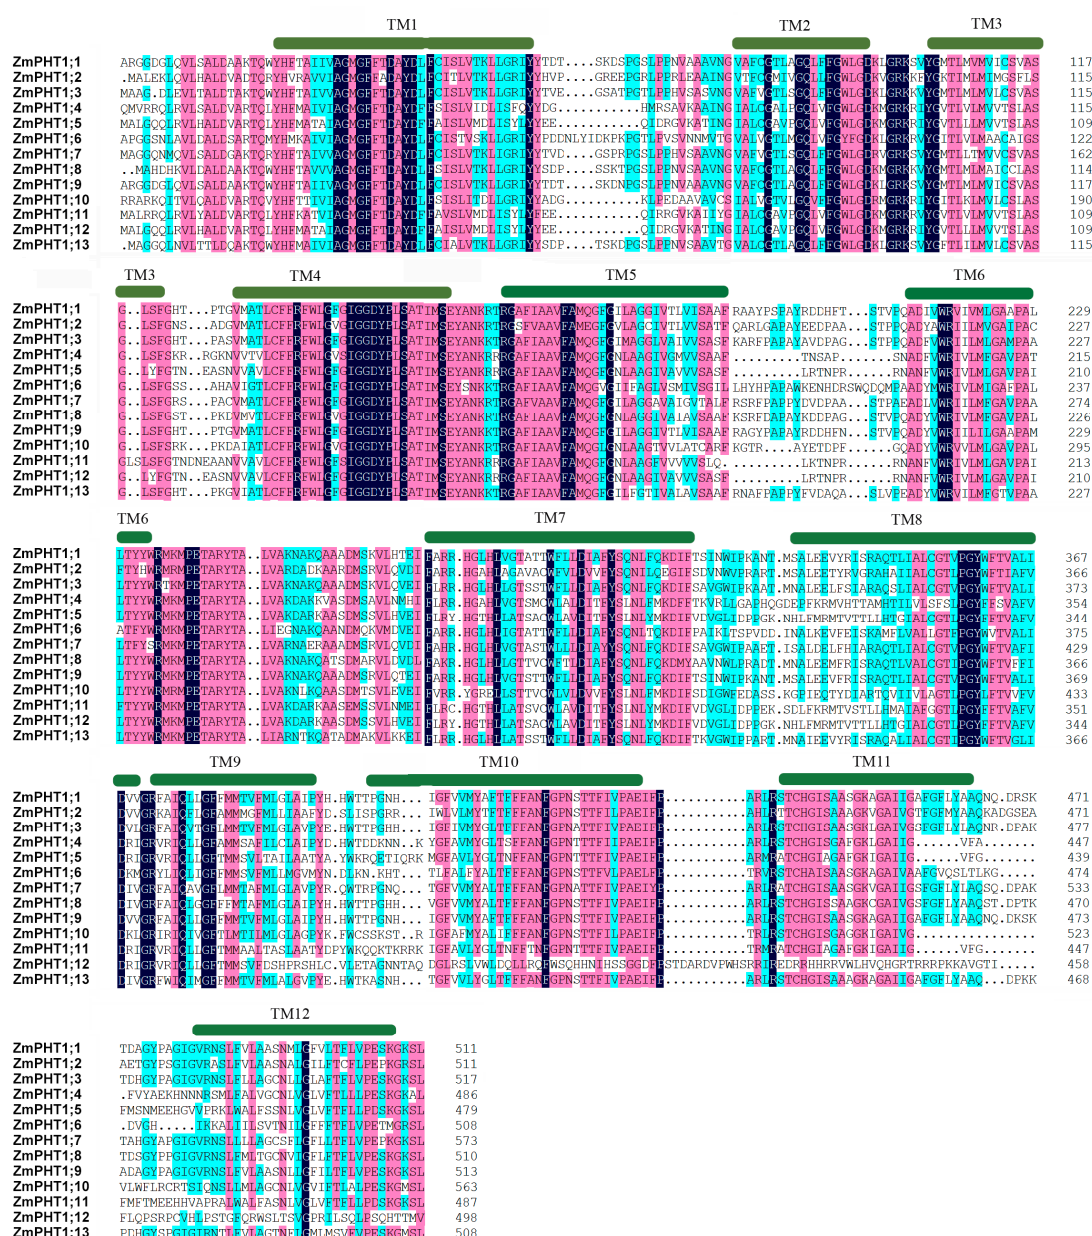

**Figure S1.** Multiple alignment of maize ZmPt1 to ZmPt13 proteins. Sequence alignment analysis was carried out using multiple alignment of DNAMAN 6.0 program. Identical amino acids are shaded and gaps are indicated by dots. Dark blue, red and light blue shading indicate identical, highly conserved and conserved amino acid residues, respectively. The predicted transmembrane (TM) segments were performed using the programs TMHMM.

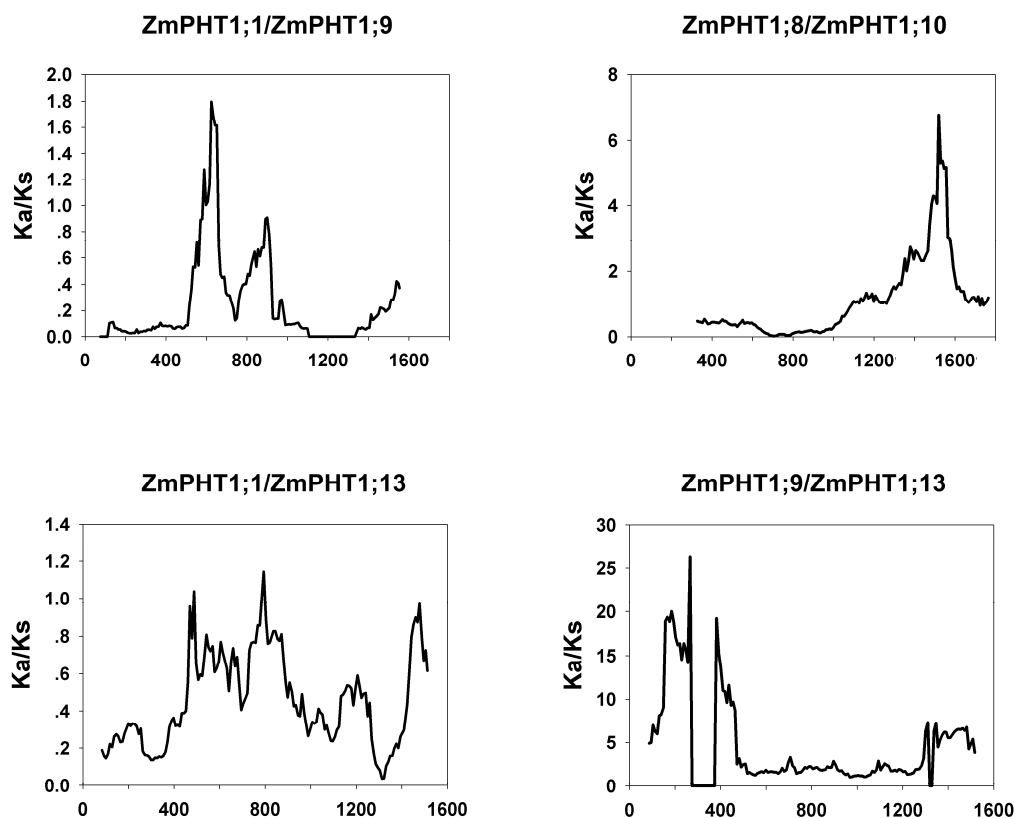

**Figure S2.** Sliding window plots of representative duplicated *ZmPt* genes in maize. The window size was 150 bp, and the step size was 9 bp.

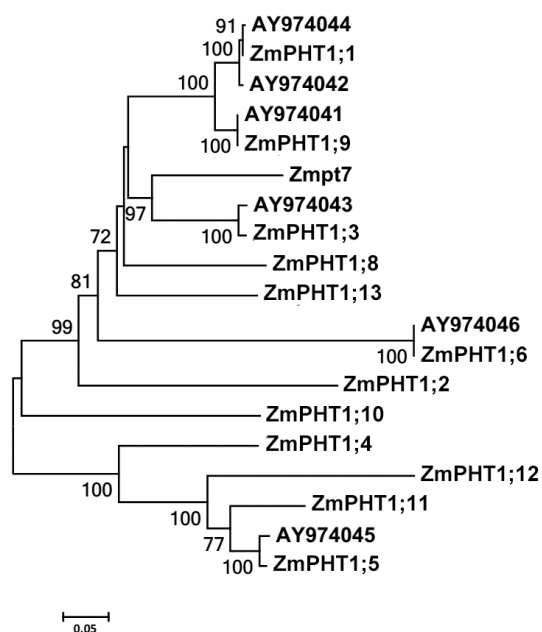

**Figure S3.** Phylogenetic tree of maize Pht1 proteins from maize inbred line B73 and commercial hybrid line. ZEAmA;Pht1;1 (AY974041), ZEAmA;Pht1;2 (AY974042), ZEAmA;Pht1;3 (AY974043), ZEAmA;Pht1;4 (AY974044), ZEAmA;Pht1;5 (AY974045), ZEAmA;Pht1;6 (AY974046).

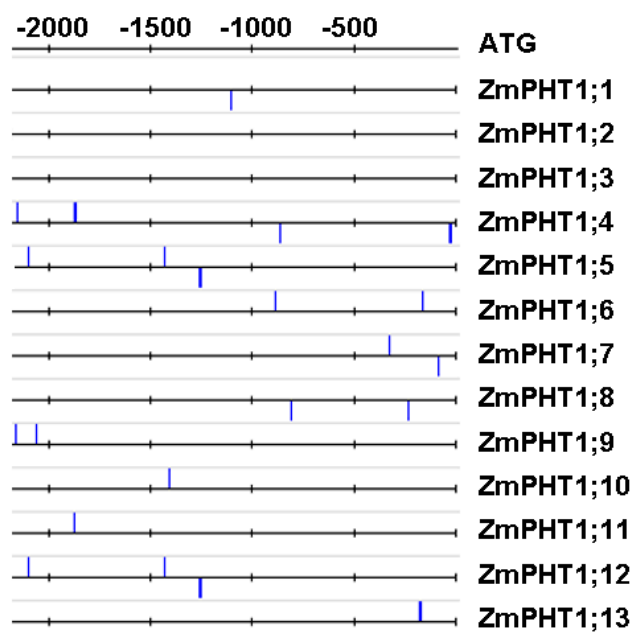

**Figure S4.** Locations of the CTC motifs in promoter regions of 13 *ZmPHT1s*. The CTC motifs are shown in blue and are located 2200 bp upstream of the start codon ATG.

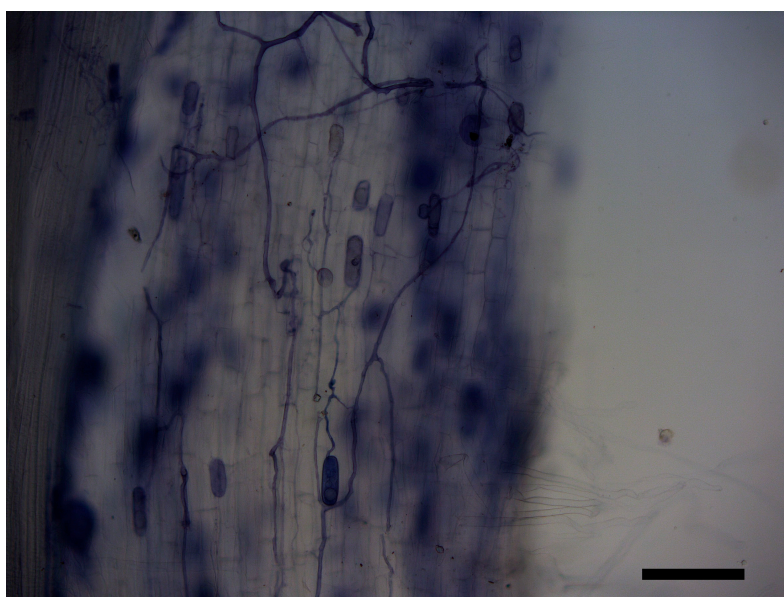

**Figure S5.** Trypan blue staining of colonized maize roots, 40 day. Maize plants were inoculated with *Glomus etunicatum*. Scale bar is 100  $\mu\text{m}$ .

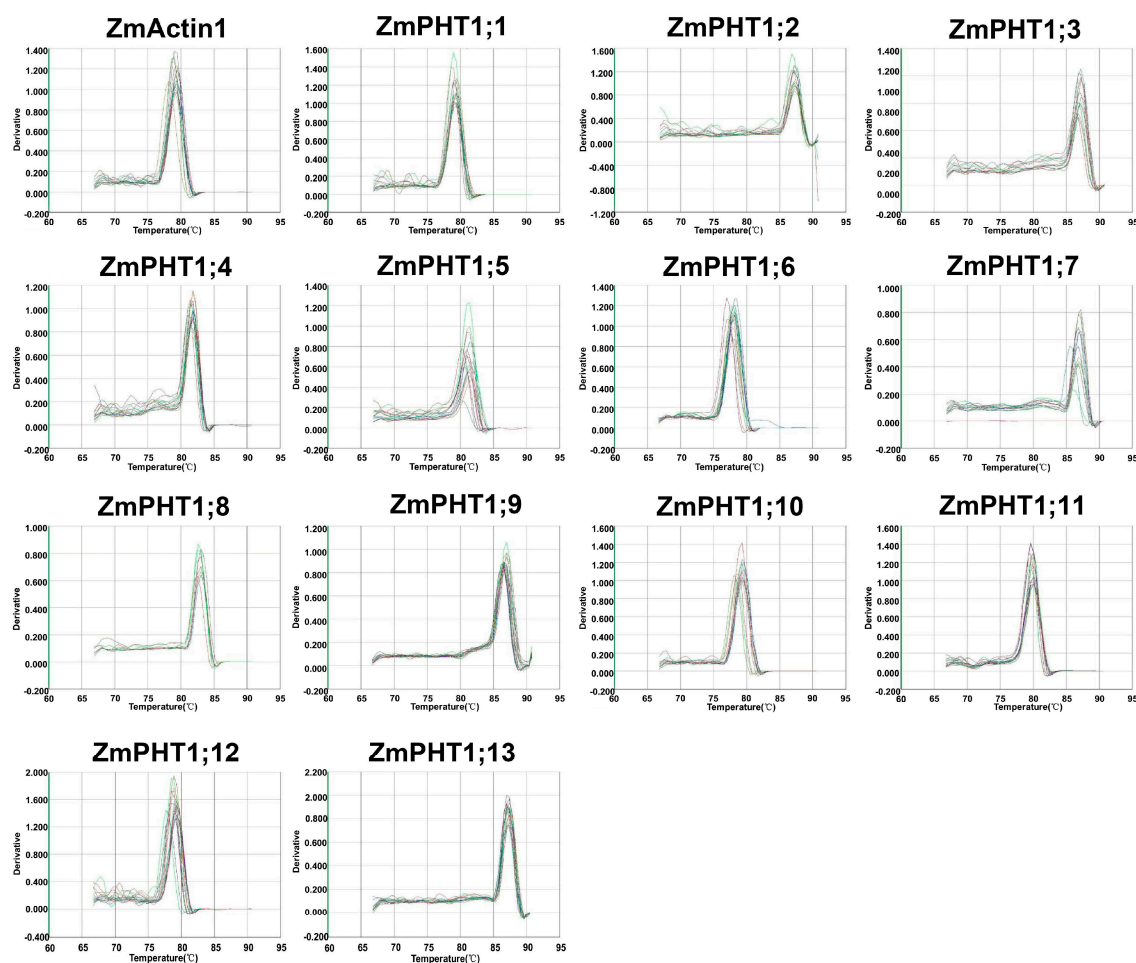

Figure S6. Melting curves for each of *ZmPHT1* genes qRT-PCR primer.

Table S1. Motifs and amino acid sequences of ZmPt proteins.

| Motif    | Sequence                                             |
|----------|------------------------------------------------------|
| motif 1  | TLCFFRFWLGF GIGGDYPLSATIMSEYANKRTRGAFIAAVFAMQGF GILA |
| motif 2  | ADYVWRIVLMFGAVPALLTYWRMKMPETARYTALVAKNAKQATSDMARV    |
| motif 3  | GLQVLSALDAAKTQWYHFTAIIVAGMGFFTDAYDLFCISLVTKLLGRIYY   |
| motif 4  | MYAFTFFFANFGPNSTTFIVPAEIFPARLRSTCHGISAASGKAGAIIGAF   |
| motif 5  | AAVNGVAFCGTLAQLFFGWLGDKLGKRSVYGMTLMLMVICSVASGLSFG    |
| motif 6  | FGLFSREFARRHGLHLVGTSTTWFLLDIAFYSQLFQKDIFTSINWIPKA    |
| motif 7  | QTLIALCGTVPGYWFTVALIDVVGRF AIQLLGGFFMMTVFMLGLAIPYHHW |
| motif 8  | YPAGIGVRNSLFLVAASNMLGFVLTFLVPESKGSLEEMSGEAEDSEEEP    |
| motif 9  | VAIVVSASF KARFPAPAYAVDPAGSTPPQ                       |
| motif 10 | NTMSALEEVYRISRA                                      |

Table S2. qRT-PCR primers.

| Primer Names | Primer Sequence       |
|--------------|-----------------------|
| Zmpt1F       | GCCTTCACCTTCTTCTTCGC  |
| Zmpt1R       | CCGTCTTGCTCCTGTCCTG   |
| Zmpt2F       | GTTCCGGTTCATGTATGCG   |
| Zmpt2R       | GCAGGAAGCAGGTGAAGAGTA |
| Zmpt3F       | TCGTCGGCTCCTTCGGGTTT  |
| Zmpt3R       | ACACGGGCACTGTGCGGTTG  |
| Zmpt4F       | TGCCTCGCTATCCCTTAT    |
| Zmpt4R       | GCTTCGGTTGTTGTTATGTT  |
| Zmpt5F       | CGCAGTCTTGTATGGCTTGA  |
| Zmpt5R       | GCGCCTATCTTCCCGAAT    |
| Zmpt6F       | GGACACCTGCCTTACATTGCC |
| Zmpt6R       | TCGTAGGCGTCGGTGAAGAA  |
| Zmpt7F       | GCCTCCTCCGCATCCACTA   |
| Zmpt7R       | CGTCGGTGAAGAAGCCCATC  |
| Zmpt8F       | CACTTCTTCTTCGCCAACTT  |
| Zmpt8R       | ACAGGAACCCAAATGACCC   |
| Zmpt9F       | ACCACATCGGCTTCGTCG    |
| Zmpt9R       | CCGCCTTGCTCTTGTCTCTG  |
| Zmpt10F      | TCTGGTTCCCTCCGCTGTC   |
| Zmpt10R      | AAGTTCCTCGTTCCGTTG    |
| Zmpt11F      | ATCATCGGCGTGTTTGGC    |
| Zmpt11R      | CAGCGACTTACCTTTGGAAT  |
| Zmpt12F      | TCCCAACACCACAACATTC   |
| Zmpt12R      | TCTTCCAGCGACTTACCTT   |
| Zmpt13F      | CGTCCTCTACGGGCTCACCT  |
| Zmpt13R      | TGTTGCGGATGCCGATGC    |
| ZmActinF     | GGGATTGCCGATCGTATGAG  |
| ZmActinR     | GAGCCACCGATCCAGACACT  |

**Table S3.** Gene name and Gene ID of Pht1 genes in rice, sorghum and *Brachypodium*.

| <b>Gene Name</b> | <b>Gene ID</b> |
|------------------|----------------|
| <i>BdPt1</i>     | Bradi1g00700.1 |
| <i>BdPt2</i>     | Bradi1g42610.1 |
| <i>BdPt3</i>     | Bradi1g52590.1 |
| <i>BdPt4</i>     | Bradi1g75020.1 |
| <i>BdPt5</i>     | Bradi1g75030.1 |
| <i>BdPt6</i>     | Bradi1g76010.1 |
| <i>BdPt7</i>     | Bradi2g45520.1 |
| <i>BdPt8</i>     | Bradi3g12590.1 |
| <i>BdPt9</i>     | Bradi3g27680.1 |
| <i>BdPt10</i>    | Bradi5g02730.1 |
| <i>BdPt11</i>    | Bradi5g02750.1 |
| <i>BdPt12</i>    | Bradi5g02760.1 |
| <i>BdPt13</i>    | Bradi5g02770.1 |
| <i>OsPt1</i>     | LOC_Os03g05620 |
| <i>OsPt2</i>     | LOC_Os03g05640 |
| <i>OsPt3</i>     | LOC_Os10g30770 |
| <i>OsPt4</i>     | LOC_Os04g10750 |
| <i>OsPt5</i>     | LOC_Os04g10690 |
| <i>OsPt6</i>     | LOC_Os08g45000 |
| <i>OsPt7</i>     | LOC_Os03g04360 |
| <i>OsPt8</i>     | LOC_Os10g30790 |
| <i>OsPt9</i>     | LOC_Os06g21920 |
| <i>OsPt10</i>    | LOC_Os06g21950 |
| <i>OsPt11</i>    | LOC_Os01g46860 |
| <i>OsPt12</i>    | LOC_Os03g05610 |
| <i>OsPt13</i>    | LOC_Os04g10800 |
| <i>SbPt1</i>     | Sb01g046890.1  |
| <i>SbPt2</i>     | Sb06g002800.1  |
| <i>SbPt3</i>     | Sb01g047910.1  |
| <i>SbPt4</i>     | Sb01g020580.1  |
| <i>SbPt5</i>     | Sb01g046900.1  |
| <i>SbPt6</i>     | Sb07g023780.1  |
| <i>SbPt7</i>     | Sb01g020570.1  |
| <i>SbPt8</i>     | Sb02g009880.1  |
| <i>SbPt9</i>     | Sb06g002560.1  |
| <i>SbPt10</i>    | Sb06g002540.1  |
| <i>SbPt11</i>    | Sb03g029970.1  |

**Table S4.** Comparisons of *Pht1* genes in maize hybrid and inbred lines.

| <b>Gene Name</b>               | <b>Gene Name</b> | <b>Protein Identity</b> |
|--------------------------------|------------------|-------------------------|
| <i>ZEAmA;Pht1;1</i> (AY974041) | <i>ZmPt9</i>     | 100%                    |
| <i>ZEAmA;Pht1;2</i> (AY974042) | <i>ZmPt1</i>     | 98.17%                  |
| <i>ZEAmA;Pht1;3</i> (AY974043) | <i>ZmPt3</i>     | 97.62%                  |
| <i>ZEAmA;Pht1;4</i> (AY974044) | <i>ZmPt1</i>     | 99.81%                  |
| <i>ZEAmA;Pht1;5</i> (AY974045) | <i>ZmPt5</i>     | 98.23%                  |
| <i>ZEAmA;Pht1;6</i> (AY974046) | <i>ZmPt6</i>     | 100%                    |
